# Supplementary material for: Galvanic replacement mediated synthesis of rGO–Mn3O4–Pt nanocomposites for the oxygen reduction reaction
Source: Royal Society of Chemistry journal article supplement (doi:10.1039/c6ra20104k), 2016-01-01
Supplement: c6ra20104k1.pdf [file c6ra20104k1.pdf]

## Supporting Information

### Galvanic replacement mediated synthesis of rGO-Mn<sub>3</sub>O<sub>4</sub>-Pt nanocomposites for oxygen reduction reaction

Wen Jin, Xijiang Han,\* Yanzhen He, Bin Zhang, Ping Xu,\* and Yunchen Du\*

School of Chemistry and Chemical Engineering, Harbin Institute of Technology, Harbin 150001, China.

E-mail: pxu@hit.edu.cn; yunchendu@hit.edu.cn; hanxijiang@hit.edu.cn; Fax: +86-451-8641-8750

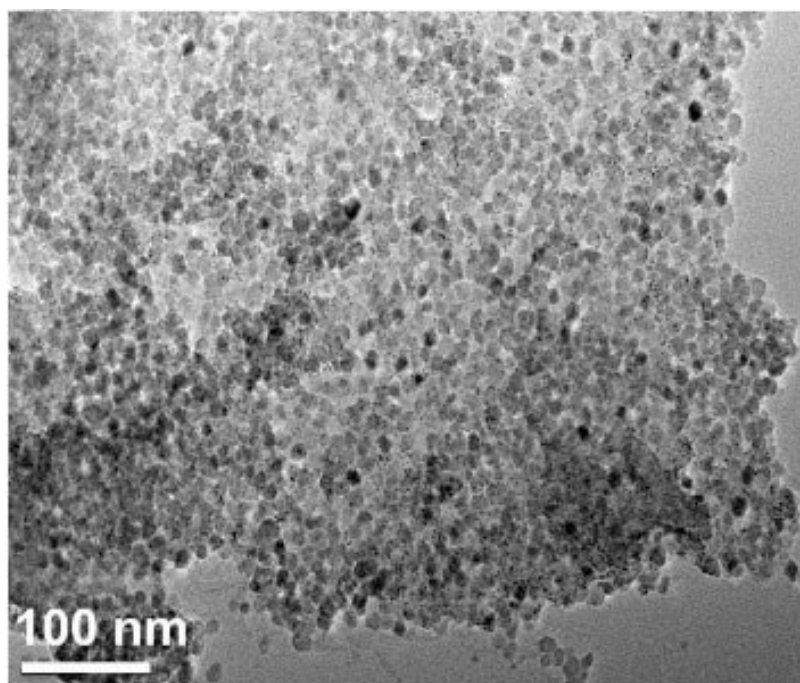

**Fig. S1.** TEM image of rGO-Mn<sub>3</sub>O<sub>4</sub>-Pt-1.

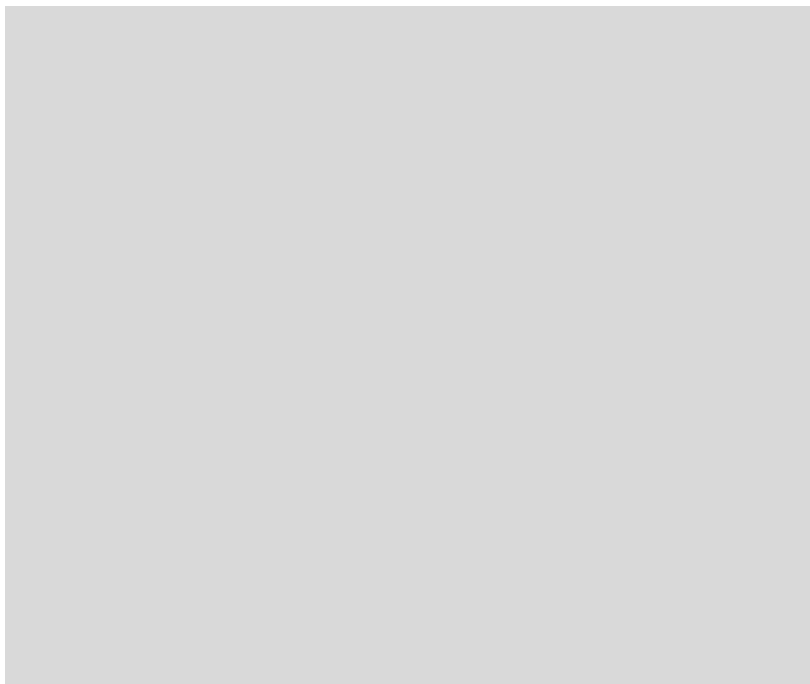

**Fig.S2** HR-TEM image of the rGO-Mn<sub>3</sub>O<sub>4</sub>-Pt-1 nanocomposites

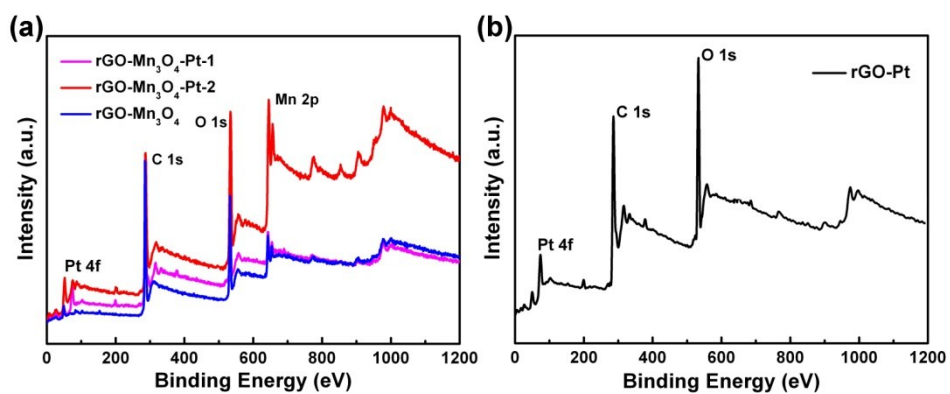

Fig. S3 (a) XPS survey spectra of rGO-Mn<sub>3</sub>O<sub>4</sub>, rGO-Mn<sub>3</sub>O<sub>4</sub>-Pt-1, rGO-Mn<sub>3</sub>O<sub>4</sub>-Pt-2, (b) XPS survey spectra of rGO-Pt.

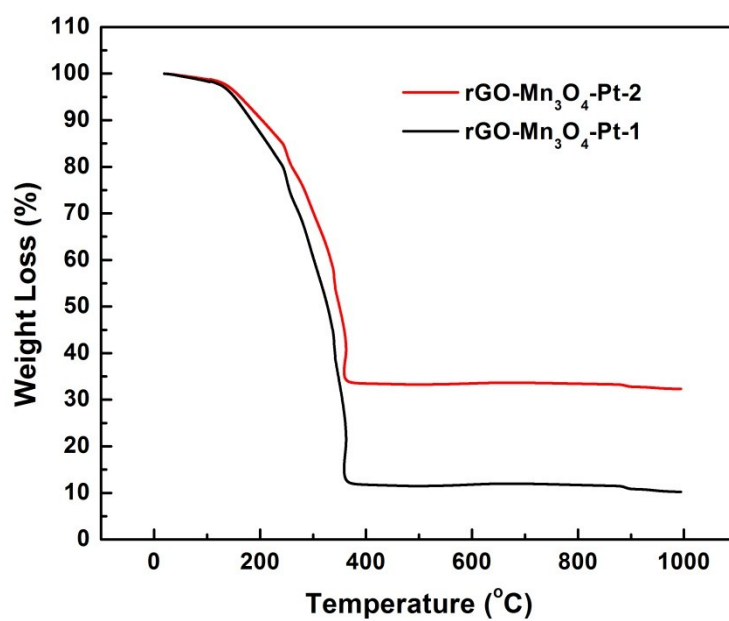

**Fig. S4** Thermogravimetric (TG) curves of the two rGO-Mn<sub>3</sub>O<sub>4</sub>-Pt samples after strong acid washing, where Mn<sub>3</sub>O<sub>4</sub> was completely removed before analysis. The experiment was carried out in air atmosphere.

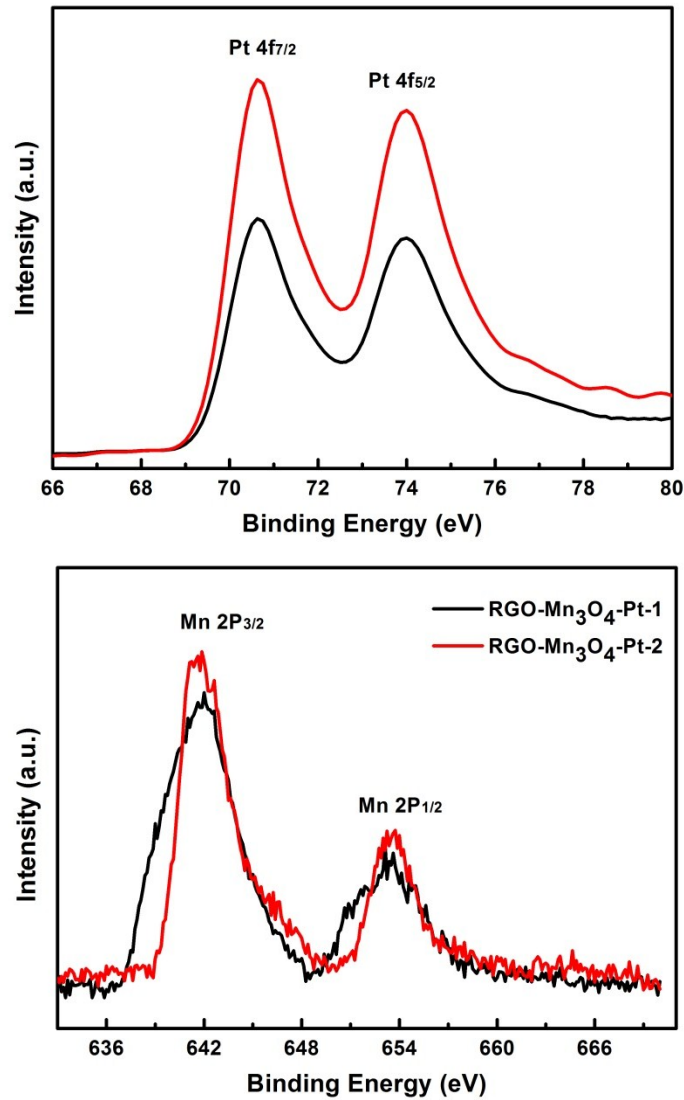

**Fig. S5** Pt 4f and Mn 2p XPS spectra of the two rGO-Mn<sub>3</sub>O<sub>4</sub>-Pt samples. Pt 4f<sub>7/2</sub> and Pt 4f<sub>5/2</sub> peaks at 71 eV and 74.3 eV in the Pt 4f XPS spectra of both rGO-Mn<sub>3</sub>O<sub>4</sub>-Pt nanocomposites are typical for zero-valent Pt. Mn 2p spectra display two peaks at 641.5 and 653.2 eV corresponding to Mn 2p<sub>3/2</sub> and Mn 2p<sub>1/2</sub>, respectively, an indication that the obtained manganese oxide still exists as Mn<sub>3</sub>O<sub>4</sub>.

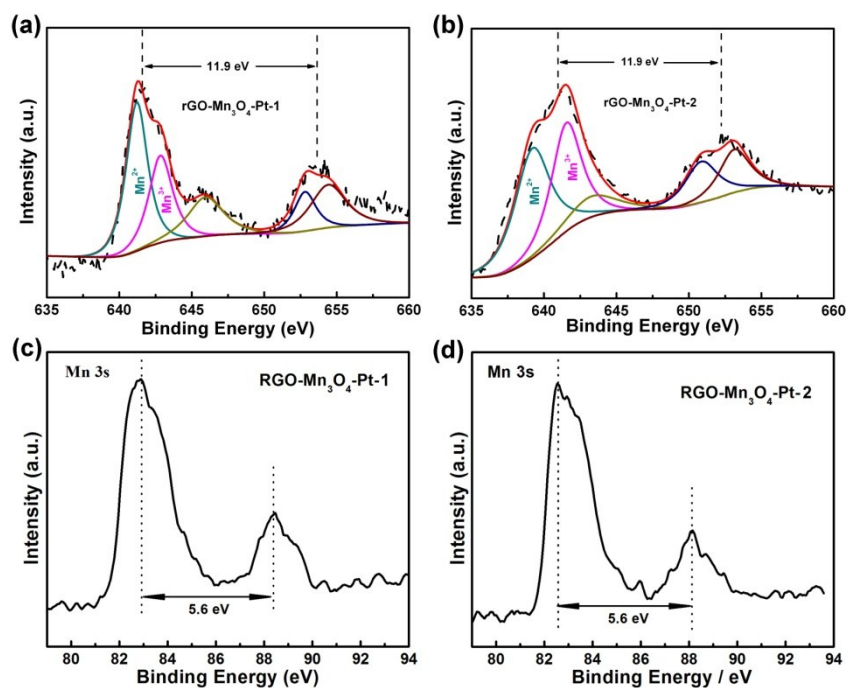

Fig. S6 The high-resolution XPS spectrum of Mn 2p for (a) rGO-Mn<sub>3</sub>O<sub>4</sub>-Pt-1 and (b) rGO-Mn<sub>3</sub>O<sub>4</sub>-Pt-2, XPS survey spectra of Mn 3s for (c) rGO-Mn<sub>3</sub>O<sub>4</sub>-Pt-1 and (d) rGO-Mn<sub>3</sub>O<sub>4</sub>-Pt-2.

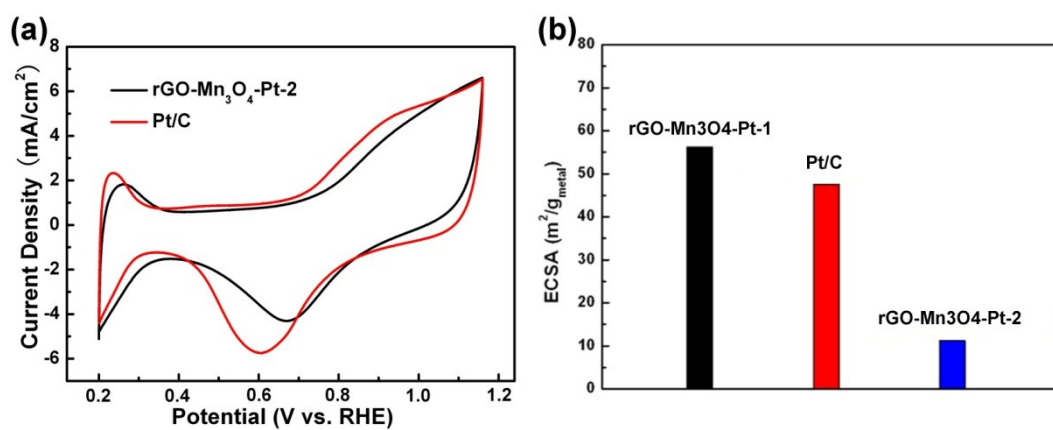

Fig. S7 (a) CV curves of rGO-Mn<sub>3</sub>O<sub>4</sub>-Pt-2 nanocomposites and commercial Pt/C in N<sub>2</sub>-saturated 0.1 M KOH solution at a scanning speed of 50 mV · s<sup>-1</sup>, (b) Specific ECSAs for rGO-Mn<sub>3</sub>O<sub>4</sub>-Pt-2, rGO-Mn<sub>3</sub>O<sub>4</sub>-Pt-2, and commercial Pt/C.

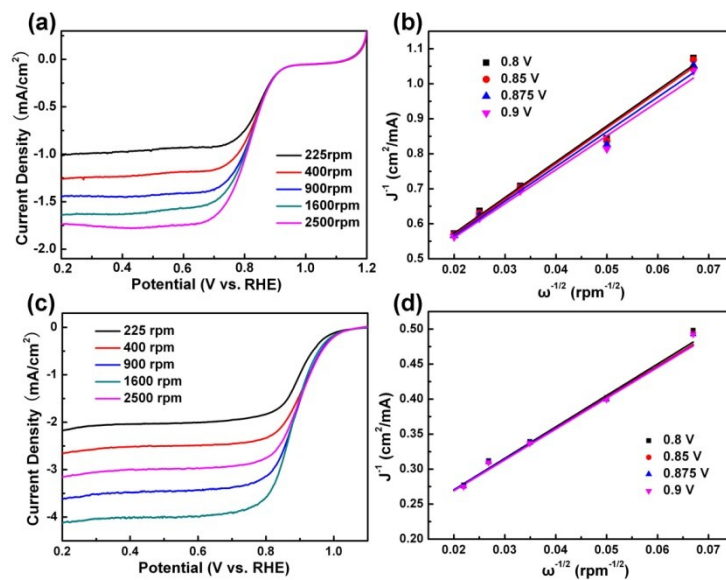

Fig. S8 (a) LSV curves of ORR over rGO-Mn<sub>3</sub>O<sub>4</sub>-Pt-2 in O<sub>2</sub>-saturated 0.1 M KOH solution at different rotation rates, (b) is the corresponding Koutecky-Levich plots derived from the LSV curves; (c) LSV curves of ORR over commercial Pt/C catalysts in O<sub>2</sub>-saturated 0.1 M KOH solution at different rotation rates, (b) is the corresponding Koutecky-Levich plots derived from the LSV curves
